# Supplementary material
Source: PubMed Central journal article supplement (PMC8199802)
Supplement: 40168_2021_1084_MOESM1_ESM.pdf [file 40168_2021_1084_MOESM1_ESM.pdf]

## **Linking genomic and physiological characteristics of psychrophilic *Arthrobacter* to metagenomic data to explain global environmental distribution**

Liang Shen, Yongqin Liu, Michelle A. Allen, Baiqing Xu, Ninglian Wang, Timothy J. Williams, Feng Wang, Yuguang Zhou, Qing Liu, Ricardo Cavicchioli

### **Additional file 1: Tibetan Plateau sampling sites, *Arthrobacter* phylogenetic, genomic, functional and metagenomic analyses**

#### **Supplementary figures**

**Fig. S1** Tibetan Plateau sampling locations

**Fig. S2** Micrococcaceae phylogenomic trees

**Fig. S3** Comparison of *Arthrobacter* genomic characteristics

**Fig. S4** Comparison of *Arthrobacter* genome-wide amino acid composition

**Fig. S5** Correlation between the content of an amino acid and genome G+C content

**Fig. S6** Protein stability predictions

**Fig. S7** Enrichment analysis of *Arthrobacter* functional potential

#### **Supplementary tables**

**Table S1** Sampling and isolation information associated with Tibetan Plateau *Arthrobacter* isolates.

**Table S2** Depth distribution of the 11 Axel Heiberg Island metagenomes enriched in Group C *Arthrobacter*

#### **Datasets (accompanying excel files)**

**Dataset S1** Micrococcaceae and *Arthrobacter* genomes used in this study

**Dataset S2** Proteins and stability equations used for stability predictions

**Dataset S3** Data used for enrichment analyses of functional categories

**Dataset S4** Gene copy number data

**Dataset S5** Protein sequences of *Arthrobacter* group-specific genes

**Dataset S6** Metagenomes used in this study

**Dataset S7** Correlation of the abundance of *Arthrobacter* with taxa from Axel Heiberg Island metagenomes

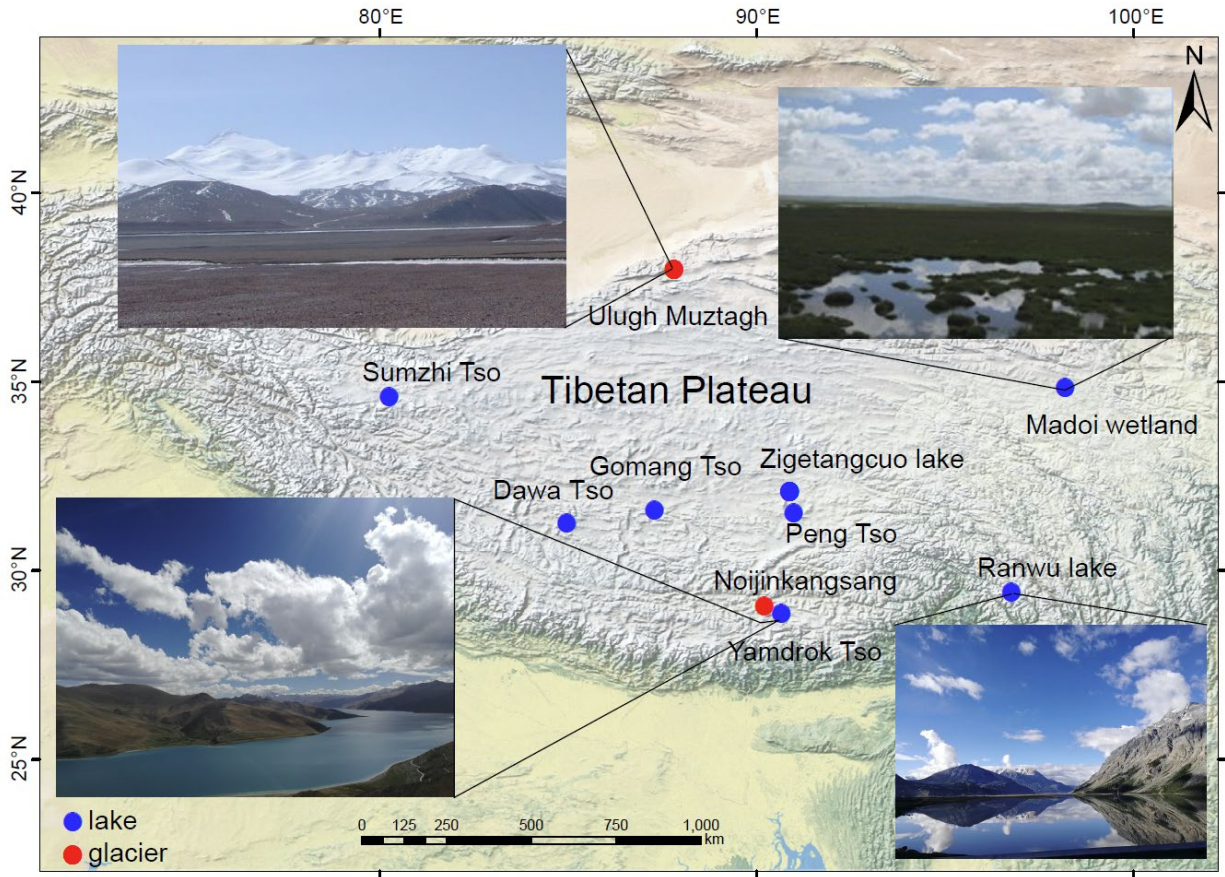

**Fig. S1** Tibetan Plateau sampling locations. ArcGIS map showing the Tibetan Plateau with the locations of lake, glacier and wetland sampling sites. Credit to Zhihao Zhang for constructing the ArcGIS map. Photo credits: Wenqiang Wang for Yamdrok Tso and Ranwu lake; Yongcui Deng for Madoi wetland; Ninglian Wang for Ulugh Muztagh glacier.

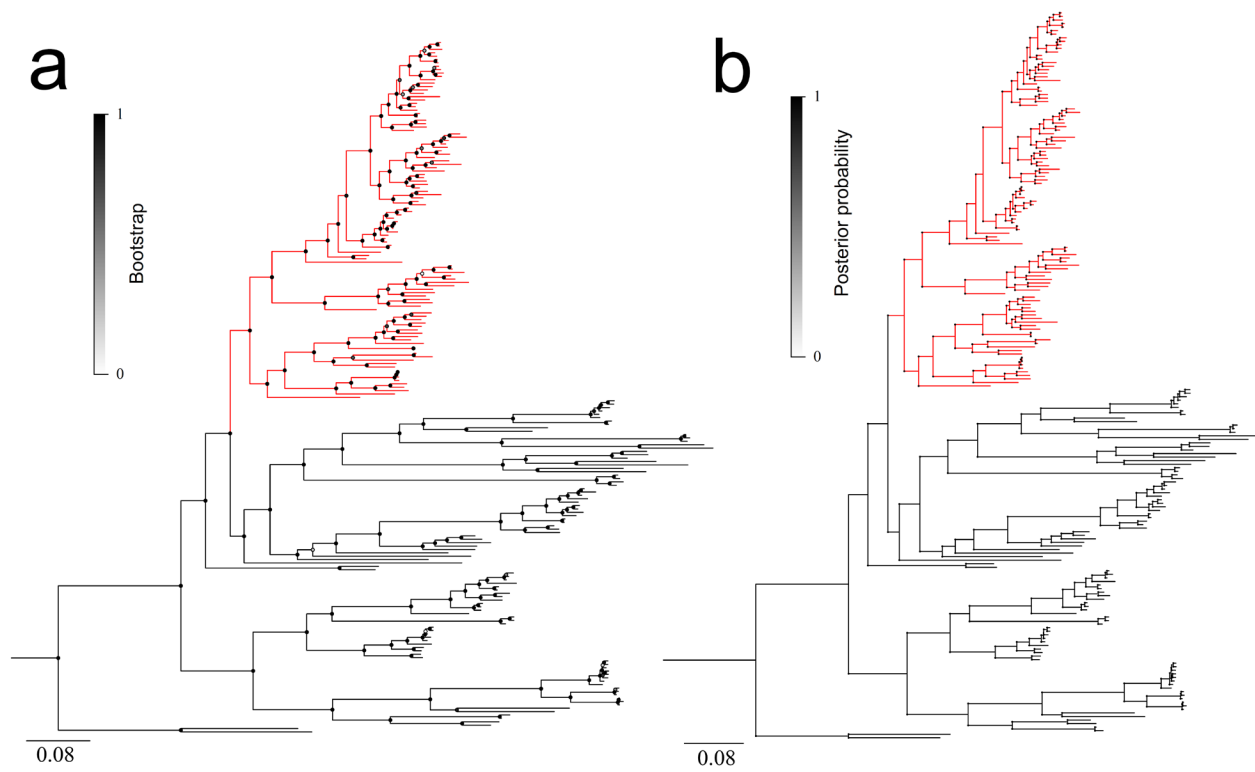

**Fig. S2** Micrococcaceae phylogenomic trees. **(a)** ML phylogenomic tree of 210 non-redundant high-quality Micrococcaceae genomes using PhyloPhlAn. **(b)** Bayesian phylogenomic tree constructed by MrBayes based on concatenated alignment of orthologous proteins from PhyloPhlAn. The upper clade of the ML and Bayesian trees represents *Arthrobacter* strains (red lines). Dots at nodes indicate bootstrap percentages for the ML tree, and posterior probabilities for the Bayesian tree. Bar, 0.08: accumulated changes per amino acid for ML and Bayesian trees.

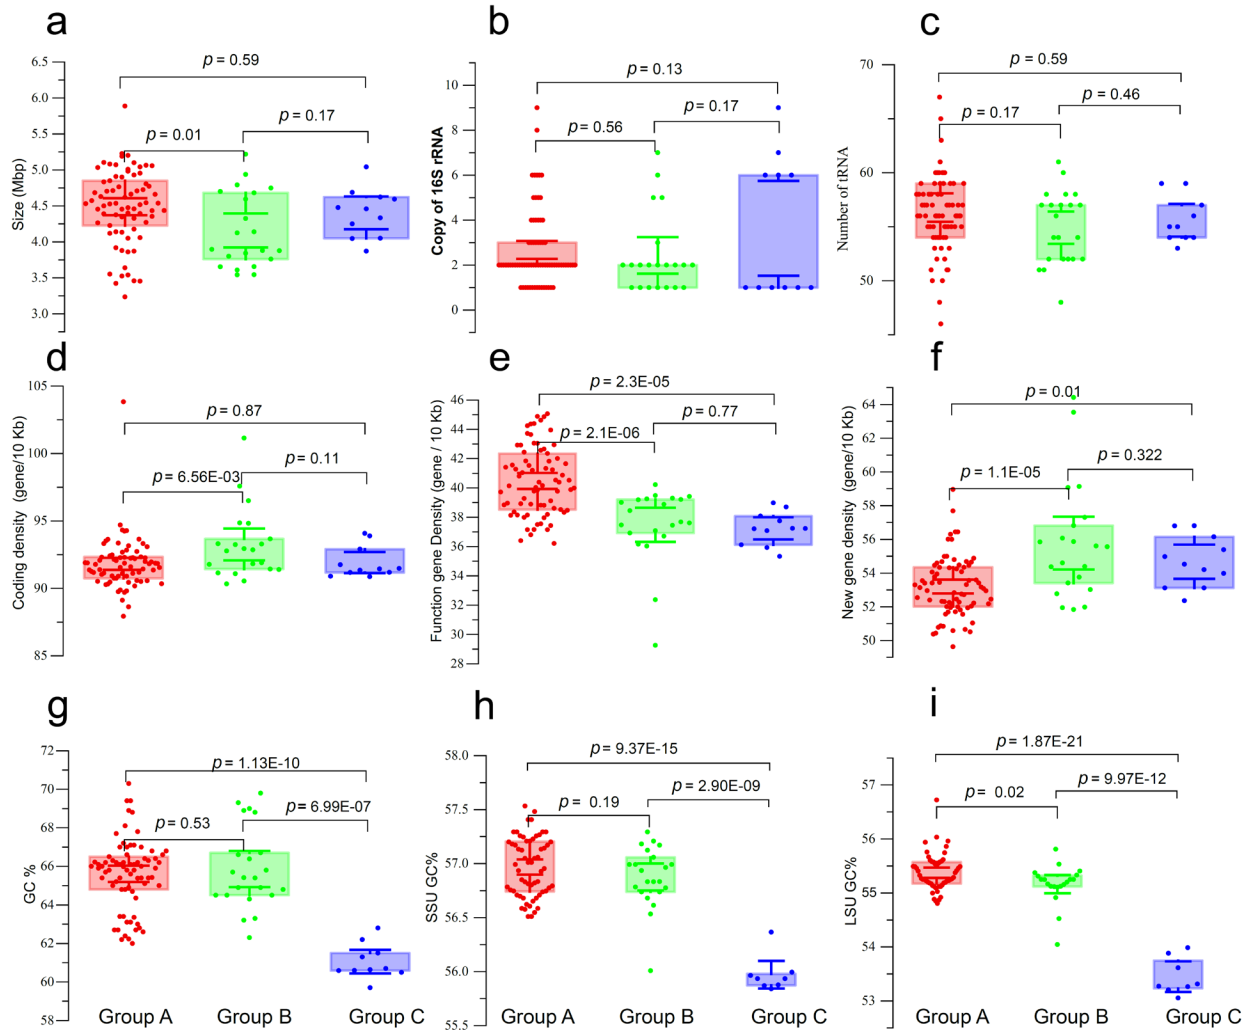

**Fig. S3** Comparison of *Arthrobacter* genomic characteristics. Box plots of genomic composition comparing Group A, B and C *Arthrobacter*. **(a)** Genome size. **(b)** 16S rRNA gene copy number. **(c)** tRNA gene copy number. **(d)** Gene coding density calculated as the sum of the length of open reading frames divided by the size of the genome. **(e)** Density of genes with annotated functions, calculated as for (d). **(f)** Density of genes with no annotated functions, calculated as for (d). **(g)** Genome G+C content. **(h)** G+C content of SSU rRNA genes. **(i)** G+C content of LSU rRNA genes. In box plots, boxes represent the interquartile range with horizontal lines showing maximum and minimum values, excluding outliers.

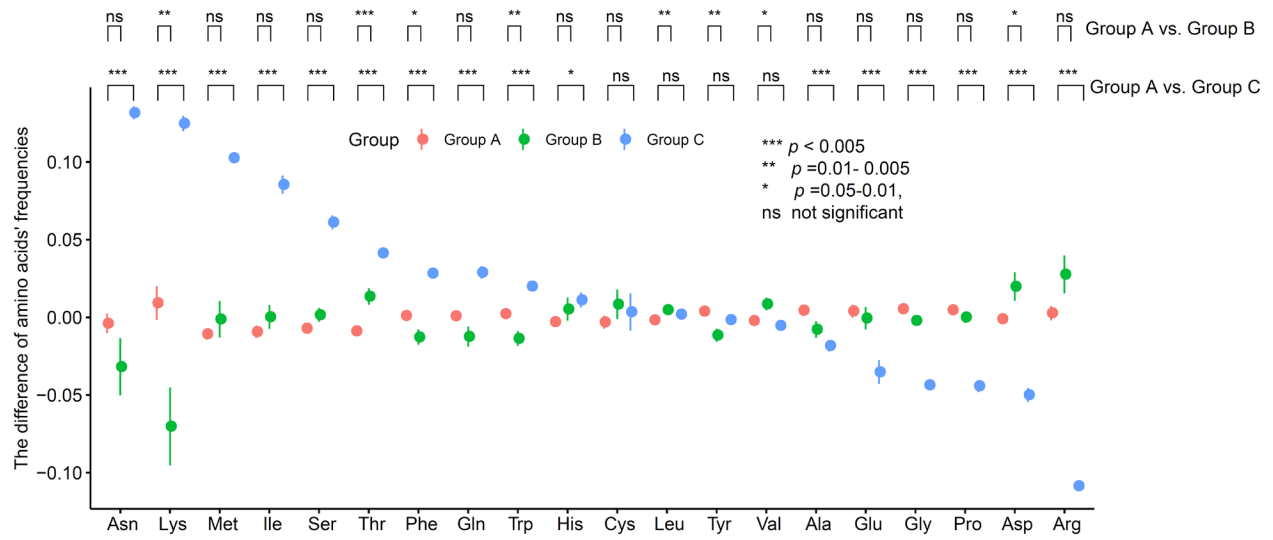

**Fig. S4** Comparison of *Arthrobacter* genome-wide amino acid composition. The mean difference (colored circles) and standard deviation (vertical bars drawn through circles) are plotted.  $P$  values were obtained using One-way ANOVA, with significance indicated above the plot for Group A vs Group B, and Group A vs Group C.

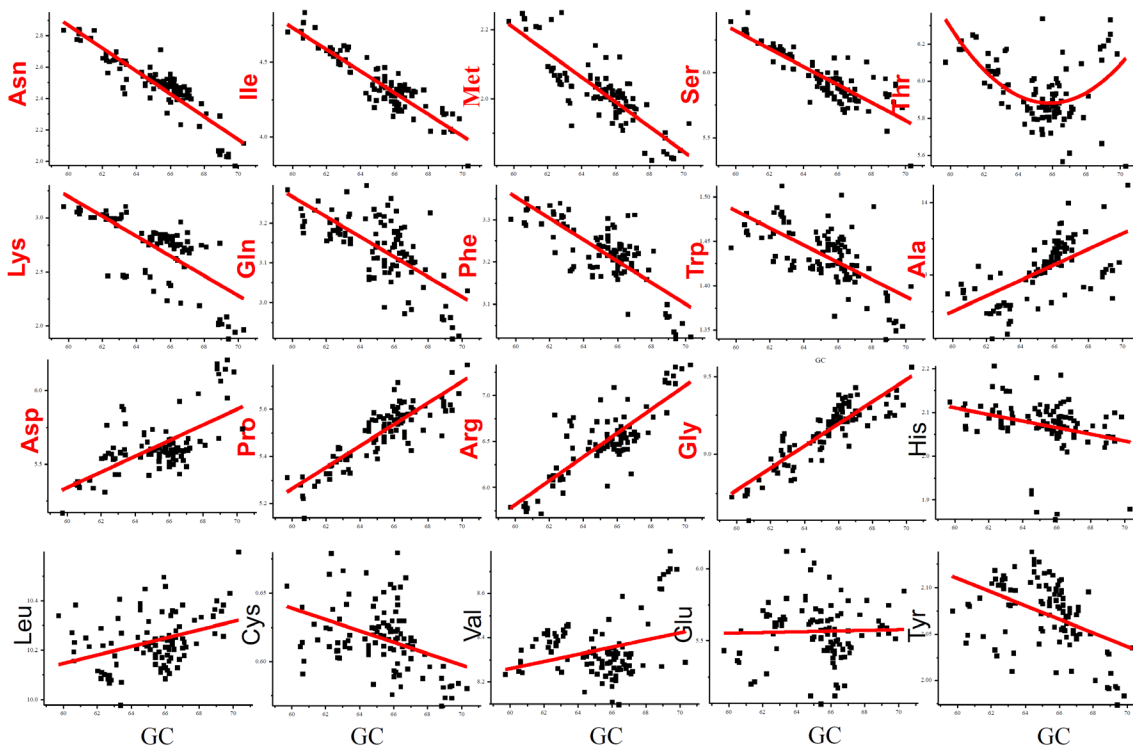

|                    | Asn    | Ile    | Met    | Ser    | Phe    | Lys    | Gln       | Gly    | Pro    | Arg    |
|--------------------|--------|--------|--------|--------|--------|--------|-----------|--------|--------|--------|
| Number of Points   | 106    | 106    | 106    | 106    | 106    | 106    | 106       | 106    | 106    | 106    |
| Degrees of Freedom | 104    | 104    | 104    | 104    | 104    | 104    | 104       | 104    | 104    | 104    |
| F Value            | 458.00 | 444.94 | 257.26 | 245.78 | 154.01 | 102.81 | 87.71     | 344.20 | 297.36 | 217.95 |
| R-Square (COD)     | 0.81   | 0.81   | 0.71   | 0.70   | 0.60   | 0.50   | 0.46      | 0.77   | 0.74   | 0.68   |
| Adj. R-Square      | 0.81   | 0.81   | 0.71   | 0.70   | 0.59   | 0.49   | 0.45      | 0.77   | 0.74   | 0.67   |
| P Value            | 0      | 0      | 0      | 0      | 0      | 0      | 1.776E-15 | 0      | 0      | 0      |

  

|                    | Asp       | Trp       | Ala       | Cys       | Glu     | His     | Leu       | Val     | Tyr       | Thr      |
|--------------------|-----------|-----------|-----------|-----------|---------|---------|-----------|---------|-----------|----------|
| Number of Points   | 106       | 106       | 106       | 106       | 106     | 106     | 106       | 106     | 106       | 106      |
| Degrees of Freedom | 104       | 104       | 104       | 104       | 104     | 104     | 104       | 104     | 104       | 103      |
| F Value            | 74.51     | 76.98     | 66.83     | 20.13     | 0.08    | 9.32    | 15.68     | 9.35    | 27.80     | 25.3203  |
| R-Square (COD)     | 0.42      | 0.43      | 0.39      | 0.16      | 0.00    | 0.08    | 0.13      | 0.08    | 0.21      | 0.33     |
| Adj. R-Square      | 0.41      | 0.42      | 0.39      | 0.15      | 0.00    | 0.07    | 0.12      | 0.07    | 0.20      | 0.32     |
| P Value            | 7.516E-14 | 3.642E-14 | 7.634E-13 | 1.876E-05 | 0.77379 | 0.00288 | 0.0001375 | 0.00284 | 7.364E-07 | 1.14E-09 |

**Fig. S5** Correlation between the content of an amino acid and genome G+C content. Linear regression showing the correlation of each of the 20 amino acids vs genome G+C content for each of the 106 *Arthrobacter* genomes. Amino acids are specified on the right hand y-axis of the plots, with  $R^2 < 0.3$  (black font) and  $R^2 > 0.3$  (red font). Statistical analyses were performed using [Origin 2018](#) with the outcomes of the linear regression shown below the plots.

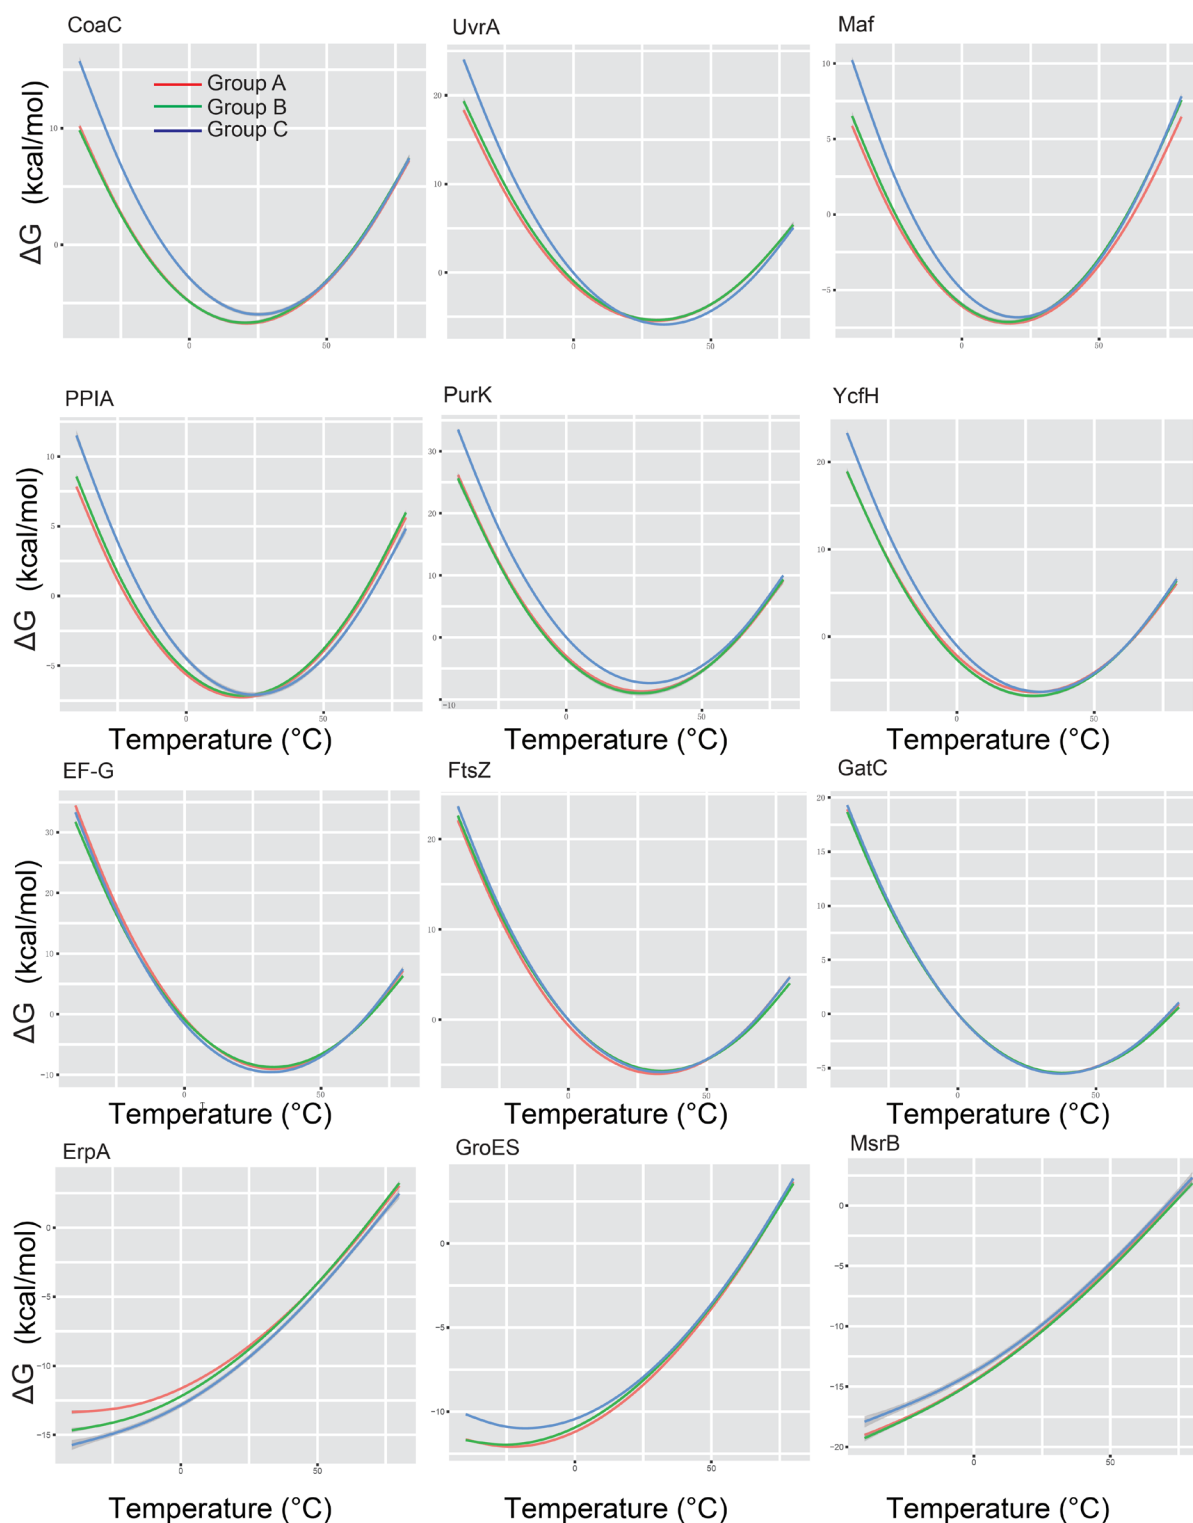

**Fig. S6** Protein stability predictions. Predicted stability curves were generated using the SCoop algorithm. Robust stability curves were generated for 86 of the 180 proteins examined. Shown are examples of Group C proteins with higher  $\Delta G$  (less stability) at  $-1^{\circ}\text{C}$  (CoaC, UvrA, Maf, PPIA, PurK, and YcfH), very similar stability curves (EF-G, FtsZ, and GatC), and proteins that did not produce meaningful stability curves (ErpA, GroES, and MsrB).

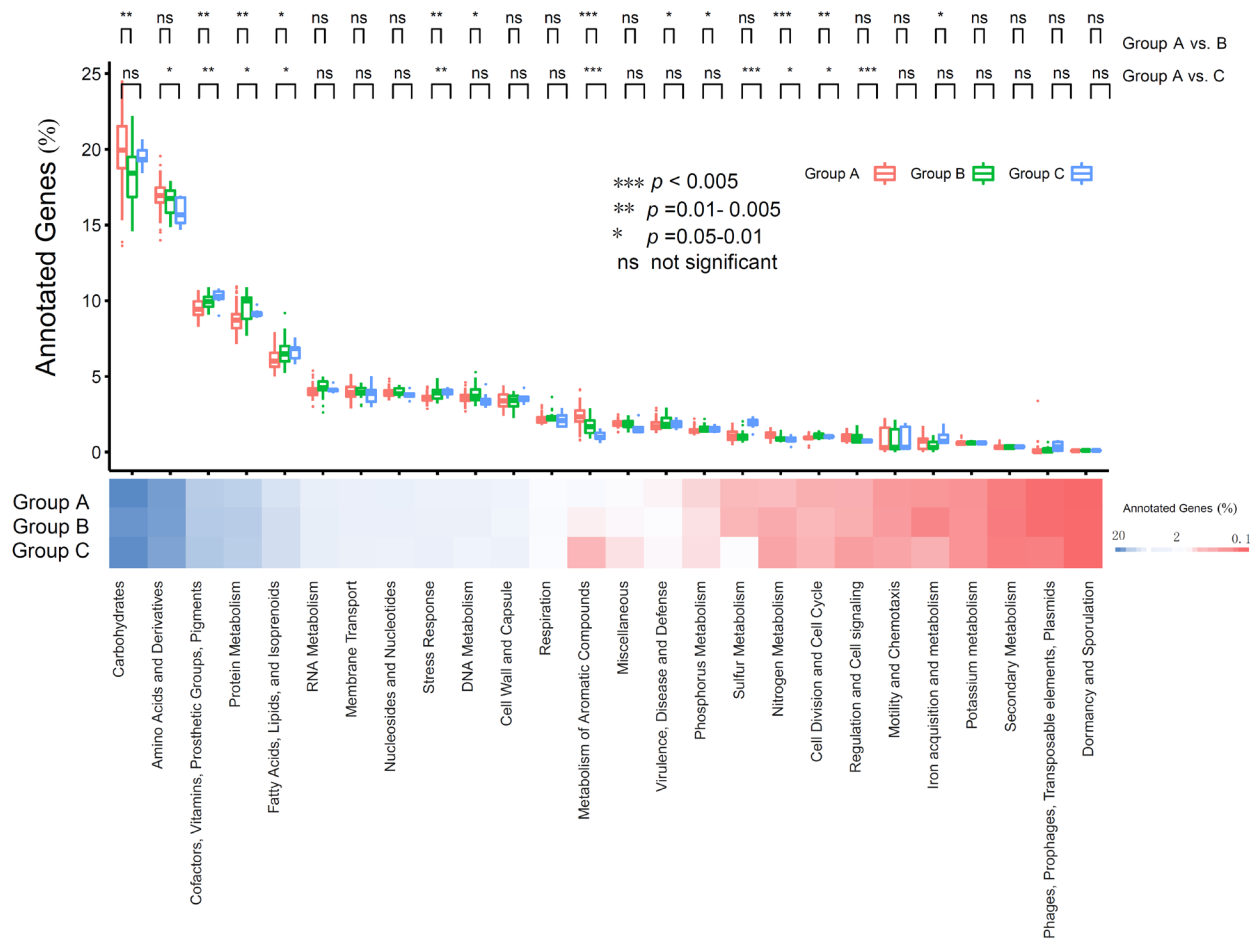

**Fig. S7** Enrichment analysis of *Arthrobacter* functional potential. Enrichment analysis was performed on functional gene categories comparing Group A, B and C *Arthrobacter* genomes. The box plots correspond to the abundance of each functional category, ranked in descending order of relative abundance from right to left along the x-axis. Significance ( $P$  values) were obtained using one-way ANOVA. The heatmap depicts the average percentage of number of genes for each functional category for each group.



**Additional file 1: Table S1** Sampling and isolation information associated with Tibetan Plateau *Arthrobacter* isolates.

| <i>Arthrobacter</i> sp. isolated <sup>1</sup> | Location <sup>2</sup>  | Latitude, Longitude <sup>3</sup> | Sample <sup>4</sup> | Date <sup>5</sup> | Temp. °C <sup>6</sup> | Lake water <sup>7</sup> |     |             |            |         | Isol. temp. °C <sup>8</sup> |
|-----------------------------------------------|------------------------|----------------------------------|---------------------|-------------------|-----------------------|-------------------------|-----|-------------|------------|---------|-----------------------------|
|                                               |                        |                                  |                     |                   |                       | Salinity g/L            | pH  | Cond. µS/cm | Chl-a µg/L | DO mg/L |                             |
| 08Y14                                         | Yamdruk Tso            | 28.8521, 90.6506                 | lake water, 08Y     | 2012 August       | 11                    | 1.5                     | 9.3 | 2400        | 0.99       | 9.3     | 24                          |
| 4R501                                         | Ranwu lake             | 29.4167, 96.7500                 | lake water, 4R5     | 2012 August       | 6                     | 0.32                    | 8.1 | 142         | 0.27       | 7.0     | 10                          |
| 9E06 <sup>9</sup>                             | Peng Tso               | 31.5006, 90.9724                 | lake water, 9E      | 2012 August       | 12                    | 8.5                     | 9.9 | 14700       | 0.18       | 6.3     | 24                          |
| 9E14 <sup>9</sup>                             | Peng Tso               | 31.5006, 90.9724                 | lake water, 9E      | 2012 August       | 12                    | 8.5                     | 9.9 | 14700       | 0.18       | 6.3     | 24                          |
| 9416 <sup>9</sup>                             | Peng Tso               | 31.5006, 90.9724                 | lake water, 9E      | 2012 August       | 12                    | 8.5                     | 9.9 | 14700       | 0.18       | 6.3     | 24                          |
| 9E18                                          | Peng Tso               | 31.5006, 90.9724                 | lake water, 9E      | 2012 August       | 12                    | 8.5                     | 9.9 | 14700       | 0.18       | 6.3     | 24                          |
| DWC3                                          | Dawa Tso               | 31.2434, 84.9646                 | lake water, DWC3    | 2012 August       | 16                    | 19                      | 9.3 | 30100       | 2.1        | 5.7     | 24                          |
| GMC3                                          | Gomang Tso             | 31.5854, 87.2862                 | lake water, GMC3    | 2012 August       | 14                    | 6.5                     | 9.8 | 11400       | 0.8        | NA      | 24                          |
| SX1312                                        | Sumzhi Tso             | 34.6000, 80.2500                 | lake water, SX13-1  | 2012 August       | 12                    | 0.26                    | 8.5 | 537         | 1.6        | 5.8     | 24                          |
| ZGTC131                                       | Zigetangcuo            | 32.0836, 90.8709                 | lake water, ZGTC1-3 | 2012 August       | 15                    | 14                      | 10  | 22400       | 0.83       | 5.9     | 24                          |
| ZGTC212                                       | Zigetangcuo            | 32.0836, 90.8709                 | lake water, ZGTC2-1 | 2012 August       | 15                    | 14                      | 10  | 22400       | 0.83       | 5.9     | 24                          |
| ZGTC412                                       | Zigetangcuo            | 32.0836, 90.8709                 | lake water, ZGTC4-1 | 2012 August       | 15                    | 14                      | 10  | 22400       | 0.83       | 5.9     | 24                          |
| Y81                                           | Madoi wetland          | 34.8333, 98.1667                 | wetland soil, Y8    | 2011 August       | 13                    |                         |     |             |            |         | 15                          |
| B0490                                         | Ulugh Muztagh glacier  | 36.4125, 87.3850                 | ice core, 25.98 m   | 2012 May          | -4                    |                         |     |             |            |         | 4                           |
| B1805                                         | Ulugh Muztagh glacier  | 36.4125, 87.3850                 | ice core, 97.07 m   | 2012 May          | -4                    |                         |     |             |            |         | 4                           |
| N199823                                       | Noijinkangsang glacier | 29.0400, 90.2000                 | ice core, 4.71 m    | 2007 August       | -7                    |                         |     |             |            |         | 4                           |

<sup>1</sup> Designation of *Arthrobacter* isolate.

<sup>2</sup> Location of lake, wetland or glacier (also see Additional file 1: Fig. S1).

<sup>3</sup> Geographic coordinates of the lake, wetland or glacier.

<sup>4</sup> Sample type denoting location on the lake or in the wetland where the sample was taken (e.g., 08Y for isolate 08Y14), or the specific depth of the glacier ice core that was used for *Arthrobacter* isolation (e.g., 25.98 m for B0490).

<sup>5</sup> Date the lake water, wetland soil or glacier ice core was obtained.

<sup>6</sup> Temperature of the sampled lake water or wetland soil, or annual mean air temperature of the glacier from which the ice core was obtained.

<sup>7</sup> Lake water measurements recorded at the time of sampling with a YSI multi-probe Water Quality Sonde (YSI EXO2, Yellow Springs, OH). Temp. (temperature °C); Cond. (conductivity); Chl-a (chlorophyll-a); DO (dissolved oxygen); NA (not available).

<sup>8</sup> Incubation temperature used for the isolation of the *Arthrobacter* isolates.

<sup>9</sup> The three isolates 9E06, 9E14 and 9E16 (highlighted in gray shading) were not used in the study due to genome quality or dereplication criteria: 9E14 did not pass the quality check as it was composed of > 300 contigs, and because 9E06, 9E16 and 9E18 had an AAI ≥ 99.5% with each other, one of the three isolates was randomly selected for use (9E18).

**Table S2** Depth distribution of the 11 Axel Heiberg Island metagenomes enriched in Group C *Arthrobacter*

| <b>Depth (cm)</b> | <b>Depth type</b> | <b>Number of Group C enriched metagenomes</b> | <b>Number of metagenomes for the depth</b> |
|-------------------|-------------------|-----------------------------------------------|--------------------------------------------|
| 5                 | Active layer      | 0                                             | 19                                         |
| 35                | Active layer      | 1                                             | 12                                         |
| 65                | Active layer      | 7                                             | 22                                         |
| 80                | Permafrost        | 3                                             | 23                                         |
